# Host-pathogen Immune Feedbacks Can Explain Widely Divergent Outcomes from Similar Infections

Stephen P. Ellner<sup>1,4</sup>, Nicolas Buchon<sup>2,4</sup>, Tobias Dörr<sup>3,4,5</sup> and Brian P. Lazzaro<sup>2,4</sup>

<sup>1</sup>Department of Ecology & Evolutionary Biology, Cornell University, Ithaca, NY 14853, USA

<sup>2</sup>Department of Entomology, Cornell University, Ithaca, NY 14853, USA

<sup>3</sup>Department of Microbiology, Cornell University, Ithaca, NY 14853, USA

<sup>4</sup>Cornell Institute for Host-Microbe Interactions and Disease, Ithaca, NY 14853, USA

<sup>5</sup>Weill Institute for Cell and Molecular Biology, Cornell University, Ithaca NY 14853, USA

Last compile: 2021-01-01 15:50

Keywords: Opportunistic pathogens, immune system, dynamic model, bistability

Author for correspondence: S.P. Ellner, e-mail [spe2@cornell.edu](mailto:spe2@cornell.edu)

**Note to reviewers:** For reviewers' convenience the main text and mathematical appendices have been uploaded as a single PDF file, although the latter will become Electronic Supplementary Materials upon acceptance of the paper. All data files and R scripts needed to replicate results in the paper have been uploaded as ESM files as part of the submission process via the *Proceedings B* submissions web page.

## 1 **Abstract**

2 A longstanding question in infection biology is why two very similar individuals, with very sim-  
3 ilar pathogen exposures, may have very different outcomes. Recent experiments have found  
4 that even isogenic *Drosophila melanogaster* hosts, given identical inoculations of some bacterial  
5 pathogens at suitable doses, can experience very similar initial bacteria proliferation but then di-  
6 verge to either a lethal infection or a sustained chronic infection with much lower pathogen load.  
7 We hypothesized that divergent infection outcomes are a natural result of mutual negative feed-  
8 backs between pathogens and the host immune response. Here we test this hypothesis *in silico*  
9 by constructing process-based dynamic models for bacterial population growth, host immune  
10 induction, and the feedbacks between them, based on common mechanisms of immune system  
11 response. Mathematical analysis of a minimal conceptual model confirms our qualitative hypoth-  
12 esis that mutual negative feedbacks can magnify small differences among hosts into life-or-death  
13 differences in outcome. However, explaining observed features of chronic infections requires an  
14 extension of the model to include induced pathogen modifications that shield themselves from  
15 host immune responses at the cost of reduced proliferation rate. Our analysis thus generates new,  
16 testable predictions about the mechanisms underlying bimodal infection outcomes.

## 17 1 Introduction

18 Despite more than a century of infectious disease research, we still do not understand why two  
19 similar individuals exposed to nearly identical bacterial infections may experience dramatically  
20 different outcomes, with some dying while others mount a successful defense and survive. It is  
21 routine to define the LD<sub>50</sub> of a given pathogen as the infectious dose at which half the infected  
22 hosts will die. But why do half die while the other half survive? Analogously, we have very  
23 little understanding of why some individuals develop severe infections while others remain safe  
24 and healthy after similar exposures to opportunistic pathogens. Widely divergent outcomes, even  
25 when controlling for genotype and environment, give the appearance that the outcome is random  
26 or arbitrary.

27 We have recently found that *Drosophila melanogaster* reared in a common controlled envi-  
28 ronment experience biphasic outcomes after identical injections (insofar as experimentally pos-  
29 sible) of an opportunistic pathogen [7]. Some hosts die from acute infection with a high  
30 pathogen burden, others survive infection but sustaining a lifelong chronic bacterial burden at  
31 much lower density (Fig. 1A). That pattern occurs even when the hosts are isogenic (Fig. 1B). Very  
32 similar patterns are seen in *Drosophila* infected with other bacteria [6, 14], flour beetles (*Tribolium*  
33 *castaneum*) infected with *Bacillus thuringiensis*, with higher survival among offspring of immune-  
34 primed mothers (Fig. 1C, data from [20, Fig.1D]), virus-infected flies [8], and *Plasmodium*-infected  
35 mosquitos (Fig. 1D, data from [1, Fig. 2A]).

36 Production of anti-microbial peptides (AMP) is a principal defense against invading bacte-  
37 ria in *Drosophila* and many other insects [13]. AMP production following pathogen invasion may  
38 be up-regulated primarily through the Imd or Toll signaling pathways (or both in combination),  
39 depending on the structure of the peptidoglycan in the bacterial cell wall [3]. Response to *Provi-*  
40 *dentencia rettgeri* primarily involves the Imd pathway. Flies deficient in Imd-dependent immune  
41 response all experienced lethally high pathogen burdens following inoculation with *P. rettgeri*  
42 (Fig. 1E), while bimodal infection outcomes persisted in Toll-deficient mutants (Fig. 1F) and in  
43 phagocytosis-deficient mutants [7].

44 In attempting to explain the observed bimodal outcomes, Duneau et al. [7] therefore tested  
45 whether flies vary in the speed and magnitude of Imd pathway induction. They found substantial  
46 variation in mRNA levels of the *Diptericin* gene, a readout of Imd pathway activity, 4 hours after  
47 pathogen injection. At that time, which is prior to the divergence in outcomes, Imd activity was  
48 more variable than bacterial load. Thus, the Imd variability presumably reflects intrinsic variabil-  
49 ity among the flies (despite their genetic homogeneity and common rearing), rather than being  
50 a side-effect of differences in bacterial population growth. Based on that finding, Duneau et al.  
51 [7] presented a phenomenological model positing that a fly either succeeds or completely fails  
52 to control the infection, depending on whether Imd up-regulation occurs before or after bacterial  
53 density crosses some threshold. Bimodality of outcomes is thus an *assumption* of their model, not  
54 an outcome.

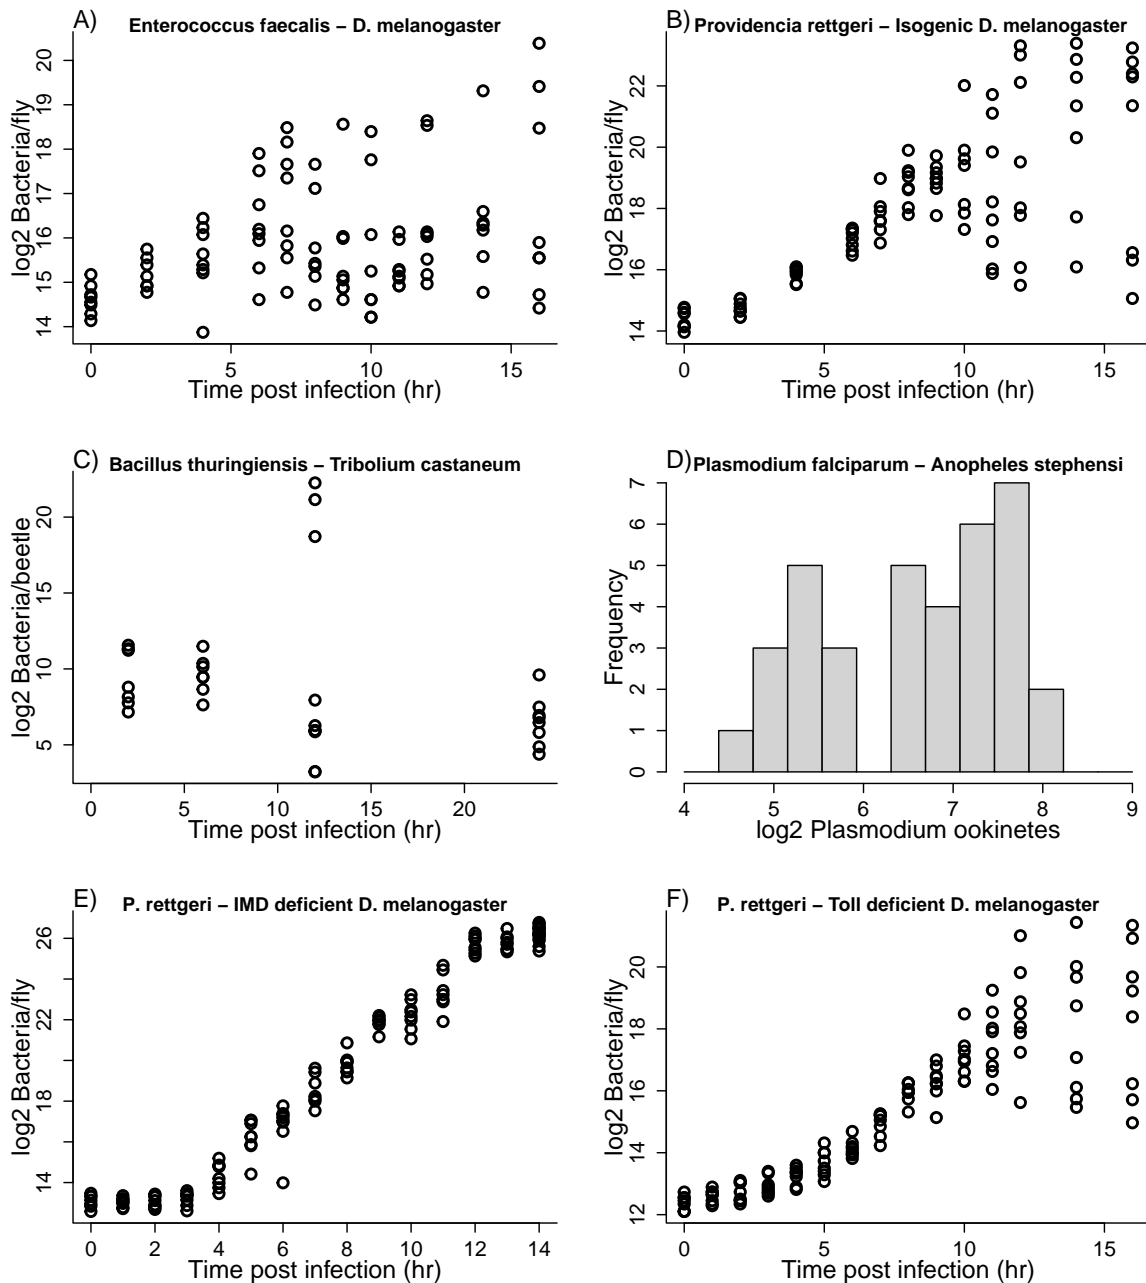

Figure 1: **A),B),E),F)** Some experimental results from Duneau et al. [7] in which flies *D. melanogaster* were given uniform injections of opportunistic pathogens but infection outcomes could be highly variable. Each data point represents a fly that was sacrificed some time after infection to assay its total bacterial load. **C)** Experimental results from [20] in which flour beetles *Tribolium castaneum* were experimentally infected with *Bacillus thuringiensis*. The data plotted are unprimed beetles from Experiment 1 of that paper. The high bacterial load beetles at 12h post infection were described as “moribund” [20]. **D)** Experimental results from Bian et al. [1, Fig. 2A] in which mosquitos *Anopheles stephensi* were experimentally infected with *Plasmodium falciparum*. The plotted data are *Plasmodium* ookinetes per midgut lumen in the LBT mosquito strain. Figure drawn by script Figure1.R.

55 Our goal here is to develop a general mechanistic explanation for outcome bimodality as  
56 an emergent property of interactions between the pathogen and host immune responses. van  
57 Leeuwen et al. [21] have recently presented an explanation specifically for intestinal parasites,  
58 based on nutritional interactions between parasite and host [e.g., 9, 10]. The mechanism in their  
59 model, parameterized for a nematode parasite of mouse, is competition for energy and nutrients:  
60 a larger pathogen population is increasingly able to divert the resources ingested by the host from  
61 the host to itself. The pathogen thus benefits from increased abundance (an Allee effect), po-  
62 tentially resulting in bimodal outcomes where infection duration is long or short depending on  
63 whether the initial pathogen abundance is above or below a threshold.

64 Here we propose an alternative, broadly applicable explanation, that bimodal infection out-  
65 comes are a natural result of two negative feedbacks: hosts mount an immune response to erad-  
66 icate the pathogen, while pathogens attempt to counteract or squelch the immune responses so  
67 they can proliferate at the expense of the host. Then, depending on the balance between host im-  
68 mune response and pathogen counter-response, the outcome can be bistable dynamics, in which  
69 similar initial states lead to widely divergent outcomes. A simple analogy is the well-known “tog-  
70 gle switch” model for two genes that mutually repress each other’s activity levels. For suitable  
71 parameter values, this results in two stable equilibria (each with one gene “on” and the other  
72 “off”), separated by an unstable saddle equilibrium. Two trajectories with very similar initial con-  
73 ditions near the origin, but on opposite sides of a separatrix (the stable manifold of the saddle)  
74 follow similar paths initially but then separate and eventually converge to different stable equilib-  
75 ria. Continuous variation in initial conditions spanning the separatrix produces discrete variation  
76 in outcomes.

77 We first present a minimal conceptual model for our hypothesis based on the *Drosophila*  
78 experimental system. We posit that flies respond to a bacterial infection by producing bacteriocidal  
79 AMPs, while bacteria can inactivate AMPs by sequestration and produce proteases that degrade  
80 AMPs [12]. In addition, bacteria can produce effectors that interfere with AMP production [e.g.,  
81 16]. A slow-fast approximation to this model produces a two-dimensional system, and phase  
82 plane analysis of that system verifies our hypothesis that bimodality is a robust outcome of the  
83 mutual negative feedbacks.

84 Importantly, we do not merely confirm that the “toggle switch” mechanism for bistability can  
85 be made to operate in a host-pathogen interaction. Our analysis shows that bistability occurs in  
86 our model across a wide range of biologically plausible parameter values, and it identifies several  
87 specific scenarios in which small between-host differences can be amplified into widely divergent  
88 outcomes.

89 However, analysis of the minimal model shows that for biologically reasonable parameter  
90 values, the “toggle switch” mechanism does not provide a complete explanation for the experi-  
91 mental observations. Specifically, it cannot explain the common observation that the pathogen is  
92 controlled in surviving hosts but not eliminated or reduced to very low numbers. Rather, there is

93 a a chronic infection held in check by sustained immune system activation [5], which can break  
94 out into an active infection if the host immune response is subsequently eliminated (B.P. Lazzaro,  
95 *unpublished data*). We therefore extend the model by allowing bacteria to enter a “protected” state  
96 where they are partially shielded from immune response. Several such mechanisms for bacterial  
97 defense against AMPs are known, including biofilm formation and various cell envelope mod-  
98 ifications [12]. The conditions for stable chronic infection in the extended model lead to new,  
99 testable predictions about the mechanisms that account for chronic infection rather than complete  
100 or near-complete elimination of the pathogen.

101 Finally, we develop a detailed model for the IMD signaling pathway, to show that our min-  
102 imal model’s “cartoon” description of immune system activation dynamics, and how it varies  
103 among individuals, can be realized in a completely mechanistic model for a defense activation  
104 pathway.

## 105 2 Conceptual model

106 Our conceptual model tracks a bacterial population  $B$  growing within an invertebrate host, suffer-  
107 ing mortality caused by host-produced AMPs  $A$ , and producing proteases  $R$  that degrade AMPs:

$$\begin{aligned} \frac{dB}{dt} &= rB(1 - B/K) - cAB \\ \frac{dA}{dt} &= f(B) - \delta_A A - hAR - cAB \\ \frac{dR}{dt} &= gB - \delta_R R \end{aligned} \tag{1}$$

$$\text{where } f(B) = \frac{Q_A B}{S_A + B}$$

109 and all parameters are positive. In the absence of AMPs, bacteria have logistic population growth  
110 with maximum per-capita growth rate  $r$  and “carrying capacity”  $K$ . The carrying capacity corre-  
111 sponds to pathogen growth ceasing because the host is completely consumed, so any model solu-  
112 tion where  $B$  gets close to  $K$  is interpreted as pathogen killing the host.  $cAB$  is bacteria mortality  
113 due to AMPs. AMP production rate  $f$  is a function of bacteria abundance, monotonic increasing  
114 from  $f(0) = 0$  and saturating at maximum rate  $Q_A$ .  $S_A$  is the bacterial abundance at which AMP  
115 production rate reaches half its maximum value. In our model, AMPs are lost three ways: natural  
116 degradation at rate  $\delta_A A$ , degradation by protease at rate  $hAR$ , and sequestration, i.e. each “kill”  
117 of a bacterium binds and thus inactivates the  $A$  molecule that was involved. Over the time-scale  
118 of interest AMPs are very stable molecules, so  $\delta_A \ll 1$  [17, 18]. However, AMPs can be produced  
119 quickly enough to create a lethal within-host environment for the pathogen [3]. Proteases  $R$  are  
120 produced by bacteria at constant per-capita rate  $g$  and degrade naturally at rate  $\delta_R R$ , which is not  
121 necessarily very small. Protease is not consumed in the process of promoting AMP degradation,  
122 so the  $hAR$  term is not replicated in the  $dR/dt$  equation.

123 To keep this “proof of concept” model as simple as possible, we have omitted two poten-  
 124 tial features of the host-pathogen interaction: a constitutive immune response (i.e., production  
 125 of AMPs in the absence of bacteria [11]), and bacterial production of effectors that interfere with  
 126 the host mounting an immune response [e.g., 16] rather than acting through AMP degradation  
 127 and sequestration. In Electronic Supporting Material ESM S.2 we present an extended model that  
 128 includes these features. We show that the only qualitative effect of the extensions is to add one  
 129 more scenario (described at the end of this section) where small individual differences in the host  
 130 immune induction can produce bimodal outcomes.

131 Before analysis we re-scale the model, setting  $\tilde{B} = B/S_A$ ,  $\tilde{A} = A/S_A$ ,  $\tilde{R} = hR$  and  $\tilde{t} = rt$ .  
 132 For the sake of visualization and analysis, we reduce the dimension of the model by assuming  
 133 that  $R$  is a “fast” (i.e.,  $g$  and  $\delta_R$  are large) that remains close to its steady state conditional on the  
 134 other variables,  $R = mB$  where  $m = g/\delta_R$ . The calculations are carried out in MAXIMA script  
 135 RescaleBAR.max. Then dropping the tilde’s on rescaled variables and parameters for clarity, the  
 136 model we consider is

$$\begin{aligned} \frac{dB}{dt} &= B(1 - B/K) - cAB \\ \frac{dA}{dt} &= f(B) - \delta_A A - (c + m)AB \end{aligned} \quad (2)$$

$$\text{where } f(B) = \frac{Q_A B}{1 + B}.$$

137  
 138 Note that equilibria  $(\bar{A}, \bar{B})$  of the reduced model (2) are in 1-to-1 correspondence with equilibria  
 139  $(\bar{A}, \bar{B}, m\bar{B})$  of the full system (1). Because bacterial abundance is now scaled relative to the half-  
 140 saturation abundance for immune response, and immune response is triggered when bacteria are  
 141 far below a lethal abundance, we can assume that  $K \gg 1$ . Time is scaled so that bacteria that are  
 142 unhindered by resource shortage or immune response would double in  $\log 2 \approx 0.7$  time units.  
 143 Observed doubling times are typically on the order of 1h in real time [7], so we can still assume  
 144 that  $\delta_A$  is a small parameter in the rescaled model.

145 Equilibria occur at intersections of the  $B$  and  $A$  nullclines (the sets of  $(B, A)$  values at which  
 146  $dB/dt = 0$  and  $dA/dt = 0$ , respectively). The  $B$  nullcline consists of the axis  $B = 0$  and the line  
 147  $A = c^{-1}(1 - B/K)$ ; the  $A$  nullcline is the curve

$$A = \frac{Q_A B}{(1 + B)(\delta_A + (c + m)B)}. \quad (3)$$

148  
 149 The infection-absent state ( $B = A = 0$ , open diamond) is always an equilibrium. Analysis of  
 150 the model (in electronic supplementary material ESM S.1) shows that this equilibrium is always  
 151 unstable: a small inoculum of bacteria initially increases. Other equilibria and their stability de-  
 152 pend on the configuration of the  $B$  and  $A$  nullclines in the interior of the first quadrant. There are  
 153 three possibilities, shown in Figure 2 A). Model behavior in each of these cases is analyzed in elec-  
 154 tronic supplementary material ESM S.1. When host immune response is very strong (large  $Q_A$ ,



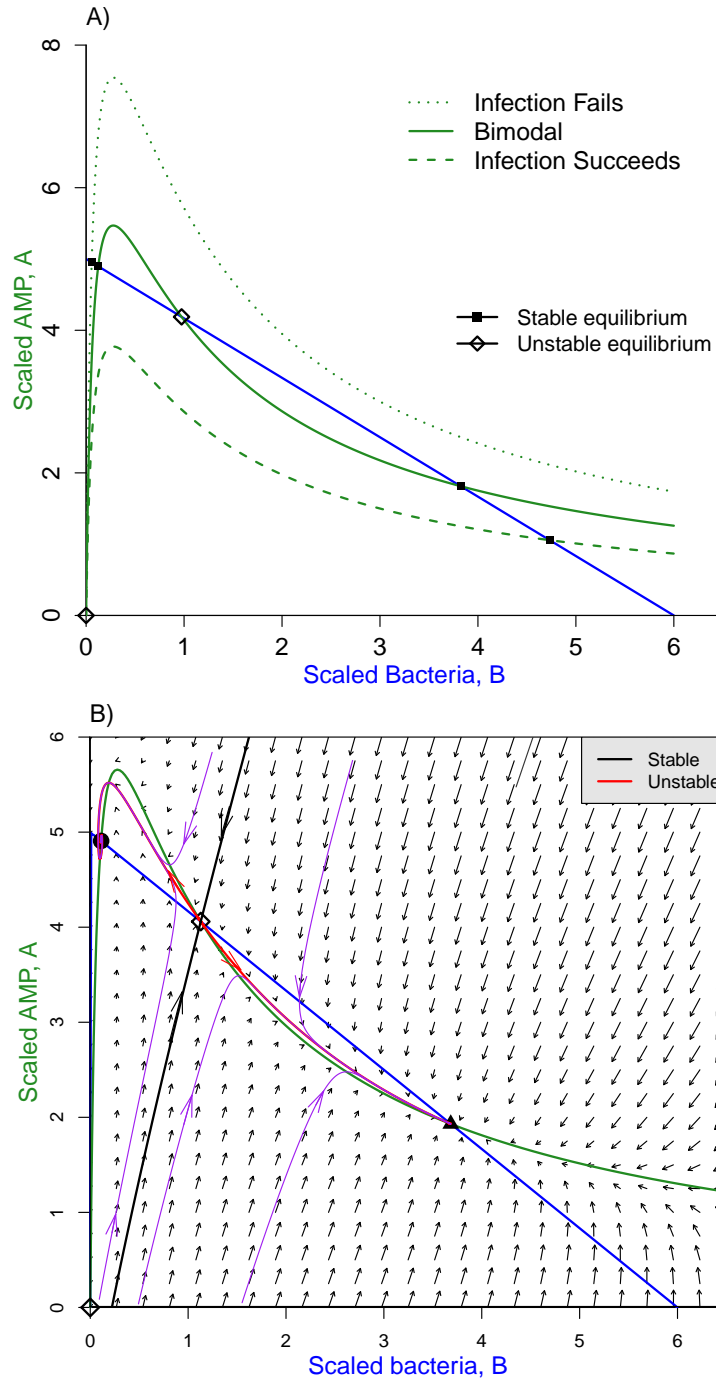

Figure 2: Phase-plane diagrams of the conceptual model. **A)** Possible nullcline configurations. The blue line is the  $B$  nullcline, the three green curves are the  $A$  nullcline for three different values of  $Q_A$  (4, 5.8, and 8) from lowest to highest, with  $K = 6, \delta_A = 0.05, c = 0.2, m = 0.45$ . Equilibria (where nullclines intersect) can be stable (solid square) or unstable (open diamond). **B)** Phase portrait in the bistable case. Black and red curves are the stable and unstable manifolds of the interior unstable equilibrium, which is a saddle. Solution trajectories (purple curves) converge to one or the other stable equilibria, depending on the location of their starting point lies. Figures were created by script files `BAnullclinesPlot.R`, `BAModel.R`.



155 dotted green curve) there is only one nullcline intersection giving a stable equilibrium at  $B \approx 0$   
156 and  $A \approx 1/c$ . Model solutions starting anywhere except  $B = A = 0$  converge to that equilibrium:  
157 immune response always holds the infection in check. When host immune response is very weak  
158 (small  $Q_A$ , dashed green curve) there is again only one possible outcome: the stable equilibrium  
159 near  $B = K, A = 0$ , representing a pathogen that has overcome the host's immune defenses. In  
160 between these extremes (solid green curve) there are three interior equilibria, one unstable and  
161 two locally stable, at widely differing pathogen densities.

162 Figure 2 B) illustrates how, in the three equilibrium case, small differences in initial condi-  
163 tions can produce large differences in the infection outcome. The unstable manifold of the middle  
164 interior equilibrium consists of two solution trajectories with exactly the right initial conditions  
165 so that solutions converge to the middle equilibrium. Initial conditions off the stable manifold  
166 lead to infection dynamics that first approach the middle equilibrium, but then veer off to one of  
167 the stable interior equilibria, depending on which side of the stable manifold they started. The  
168 right-most equilibrium is always a node, but the left-most can be a spiral (as in this example) if it  
169 occurs where the  $A$  nullcline is very steep.

170 In electronic supplementary material ESM S.1 we derive the following approximate condi-  
171 tion for occurrence of bistability in the scaled model:

$$172 \quad 1 < \frac{Q_{Ac}}{c+m} < \frac{(K+1)^2}{4K} \quad (4)$$

173 Although eqn. (4) is approximate, we have found numerically that bistability occurs when neither  
174 inequality is close to being violated. This condition can be interpreted biologically, showing that  
175 the requirements for bistability will often be satisfied. In the scaled model,  $K$  is the pathogen  
176 carrying capacity relative to the half-saturation constant for immune system up-regulation. Thus,  
177  $K$  is large, and the right-most term will be large, so long as the host responds strongly to a bacterial  
178 infection when it is still far below the level at which the host's survival is threatened. The middle  
179 term can be written as  $Q_A/(1+m/c)$ .  $Q_A$  determines how quickly the host can produce AMPs to  
180 ward off a pathogen attack, and  $m/c$  is a measure of how effectively the pathogen can counter the  
181 host by degrading AMPs, relative to the lethality of the host response. The middle term is thus a  
182 measure of the "balance of forces" between host and pathogen – if either antagonist is too strong  
183 or too weak, there is only one possible outcome. Condition (4) thus says that if the pathogen is a  
184 sufficient threat that the host responds to its presence in low numbers, bistability will occur across  
185 a wide range of values for the "balance of forces" between host and pathogen.

186 The location of the stable manifold depends on parameter values. Here, parameter values  
187 were such that small differences in initial bacterial density produce radically different outcomes.  
188 In the Duneau et al. [7] experiments, where flies differed in the time required for immune activa-  
189 tion, the "initial bacterial density" would be the bacterial density at the time of immune activa-  
190 tion, with higher bacterial density after a longer delay. The dynamics in Fig. 2 B) thus provide a qual-

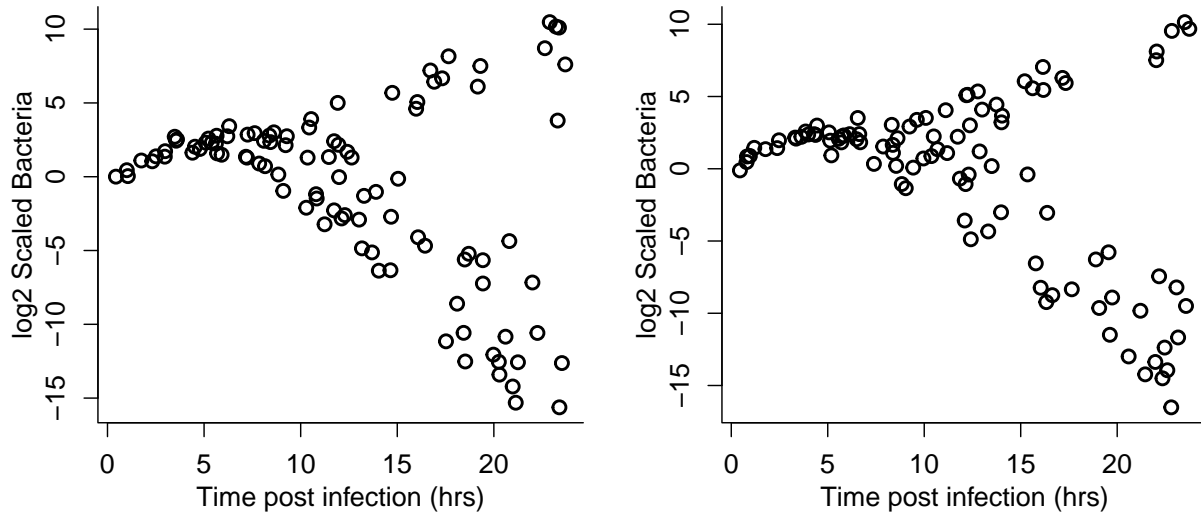

Figure 3: Two replicates of a simulated experiment with 100 host individuals each in the minimal model eqn. (2), with parameter values  $Q_A = 10, \delta_A = 0.02, c = 0.1, m = 0.2, K = 1000$ . For comparison with experimental results, time was not scaled; bacteria had intrinsic growth rate  $r = 0.5$  multiplying the logistic growth term. Each plotted point represents “data” on one host individual. Hosts vary in the delay period and ramp-up speed to full immune response, as described in the main text. Hosts were “sacrificed” at a random time between 0.25 and 24 hours, and Gaussian “measurement error” with  $\sigma = 0.35$  was added to  $\log_2(B)$ . Figure made by script `Split_Outcomes_BA.R`.

191 itative explanation for observed bimodality in outcomes from very similar inoculations of very  
192 similar flies.

193 Figure 3 shows simulations of experiments like those in Fig. 1 using the minimal model.  
194 We assumed that host individuals varied randomly in their pattern of immune system activation.  
195 This variability could have several different biological causes, including host resource or energetic  
196 limitations, but at the level of our model all that matters is the temporal pattern of activation. In all  
197 hosts, following the pathogen inoculation, the AMP production rate term  $f(B)$  was multiplied by  
198 a three-piece function representing immune system activation: a delay period during which AMP  
199 production rate is zero; a linear ramp-up from zero to one; and thereafter constant at 1. The dura-  
200 tion (in hours) of the delay period was chosen from a Uniform[1.5, 2.5] distribution, and the time  
201 required for the ramp-up was chosen from a Uniform[1,2] distribution. Each plotted point rep-  
202 represents one simulated host that was “sacrificed” at a random time, and Gaussian “measurement  
203 error” with  $\sigma = 0.35$  was added to  $\log_2(B)$ . These simulations show that our conceptual model  
204 provides a potential mechanistic basis for the hypothesis of Duneau et al. [7] that small variations  
205 in the speed of immune system activation can produce drastic, bimodal variation in outcomes. In  
206 Electronic Supplementary Material ESM S.3 we develop a detailed mechanistic model for the Imd  
207 signaling pathway leading to AMP production, and confirm that among-individual variation in

208 kinetic parameters of the pathway can produce a wide range of temporal patterns for immune  
209 activation (Fig. S-4).

210 At other parameter values, the lower left branch of the unstable manifold approaches the  
211  $A$  axis, rather than the  $B$  axis. In our extended model that includes constitutive defense (see  
212 Electronic Supplementary Material ESM S.2) this situation creates another way for small between-  
213 host differences to produce bimodal outcomes. Constitutive defense moves the pathogen-free  
214 equilibrium from the origin to a point  $(0, \alpha)$  on the  $A$  axis. The location of this equilibrium relative  
215 to the stable manifold determines whether a small invading pathogen population sparks a lethal  
216 infection, or is driven down by the host immune response (fig S-2B,C). This scenario can produce  
217 bimodal outcomes from small variance among hosts in their constitutive defense levels.

### 218 **3 Chronic infection and protected pathogens**

219 The minimal model can explain bimodal outcomes, but cannot explain another important experi-  
220 mental observation: that the alternative to host death may be a chronic, low-level infection where  
221 bacteria remain present at substantial but non-lethal levels, and the host immune response is never  
222 fully down-regulated [7, 5]. At the low- $B$  equilibrium in fig. 2 the pathogen density is extremely  
223 low. This is not just a feature of the particular parameters in that figure. The slope of the  $A$   
224 nullcline (green curve) at  $B = 0$  is  $Q_A/\delta_A$ , so it rises very steeply, and the peak of the nullcline  
225 occurs at  $B = \sqrt{\frac{\delta_A}{c+m}}$ . So under the biologically relevant assumption that  $\delta_A$  is small, and host and  
226 pathogen interact strongly (so  $c$  and  $m$  are not small), the low- $B$  equilibrium will always occur at  
227 very low  $B$ . At the parameters used in Fig. 3, the low- $B$  equilibrium is very near zero even though  
228  $\delta_A$  is not greatly smaller than  $c$  or  $m$ . In our extended model (Electronic Supplementary Material  
229 ESM S.2) the low- $B$  equilibrium can be at  $B = 0$  when hosts have constitutive AMP production.  
230 However, empirical observation is that substantial bacterial loads can persist for the duration of  
231 life in hosts that survive the initial infection [7], engendering only a mild reduction in lifespan [4].  
232 Moreover, as bacterial abundance has been scaled in the model so that  $S_A = 1$ ,  $B \ll 1$  implies  
233 that the immune system is almost completely down-regulated, which is also out of line with the  
234 experimental observations.

235 To remove this conflict with empirical observations, we add one more feature to the pathogen  
236 population model: the ability of pathogens to achieve some degree of protection from the host  
237 immune response, at the cost of reducing their division rate. Several mechanisms are known that  
238 can produce this effect [12]. One is for cells to enter a “tolerant” or “persister” state, analogous  
239 to known mechanisms of antibiotic tolerance [2] involving either physiological changes (such as  
240 cell wall reduction or loss) or a reduction in metabolic rate (dormancy, Westblade et al. [22]). A  
241 second is for pathogens to invade some tissue that is protected from the host immune response.  
242 For example, intracellular pathogens such as *Mycobacterium tuberculosis* (the causative agent of  
243 tuberculosis) and *Listeria monocytogenes* do this by allowing themselves to be phagocytosed, then  
244 living inside the macrophage while being protected from host immune responses [15]. Any tissue

245 isolated from the host immune system could play the same function. A final possibility is for cells  
 246 to form a structure such as a biofilm that protects most cells against host immune response, and  
 247 allows them to safely remain metabolically active to some extent, while not changing dramatically  
 248 in numbers [12]. For our purposes we need not distinguish between these possible mechanisms;  
 249 we can just posit that cells can activate some mechanism affording protection at the cost of reduced  
 250 proliferation rate.

251 We thus extend the model to distinguish between “normal” bacteria  $N$ , and “protected” bac-  
 252 teria  $P$ . For a minimally complex proof of concept model, we assume that protected cells are  
 253 completely invulnerable to AMPs (without specifying how this is achieved), but have a lower in-  
 254 trinsic division rate and protease production rate than normal bacterial (by a factor  $\eta < 1$ ), and  
 255 a lower carrying capacity  $L$  (lower carrying capacity is a necessary assumption in this model, as  
 256 slower division would otherwise simply delay the progression to a high lethal pathogen burden,  
 257 but host defenses could also limit protected bacterial growth if the assumption of complete invul-  
 258 nerability is relaxed). We assume that the per-capita conversion rate from  $N$  to  $P$  states is a sigmoid  
 259 increasing function  $p(A)$  of AMP concentration. Because our focus is on modeling chronic infec-  
 260 tion states where the immune system remains activated, we omit back-conversion from  $P$  to  $N$   
 261 states that might occur at low AMP concentrations. However, we do assume that division of  $P$   
 262 cells produces both a fraction  $\nu$  of  $N$  cells. When AMP concentrations are low, these  $N$  cells could  
 263 proliferate and potentially re-seed a growing infection.

264 The model is then

$$\begin{aligned}
 \frac{dN}{dt} &= rN(1 - N/K) + \nu\eta rP(1 - P/L) - cAN - p(A)N \\
 \frac{dP}{dt} &= (1 - \nu)\eta rP(1 - P/L) + p(A)N - \delta_P P \\
 \frac{dA}{dt} &= f(N) - \delta_A A - hAR - cAN \\
 \frac{dR}{dt} &= g(N + \eta P) - \delta_R R
 \end{aligned} \tag{5}$$

265

where  $f(N) = \frac{Q_A N}{1 + N}$ .

266 For this section we again scale state variables so that  $S_A = h = 1$ , but leave time unscaled for the  
 267 sake of comparisons with experimental results. A doubling time of 1 - 2 hours ( $r = 0.35 - 0.7$ ) can  
 268 be taken as typical for the *Drosophila* pathogens shown to exhibit bimodal infection outcomes [7].

269 The extended model readily produces bimodal outcomes in which the pathogen is never  
 270 reduced to extremely low levels (Fig. 4). Simulations where the pathogen is held in check (fig.  
 271 5) confirm that the model can capture the known qualitative features of chronic infections: the  
 272 outcome is a stalemate, converging to a stable equilibrium where a small bacterial population that  
 273 continues to undergo cell divisions is held down by host immune responses. For these parameters

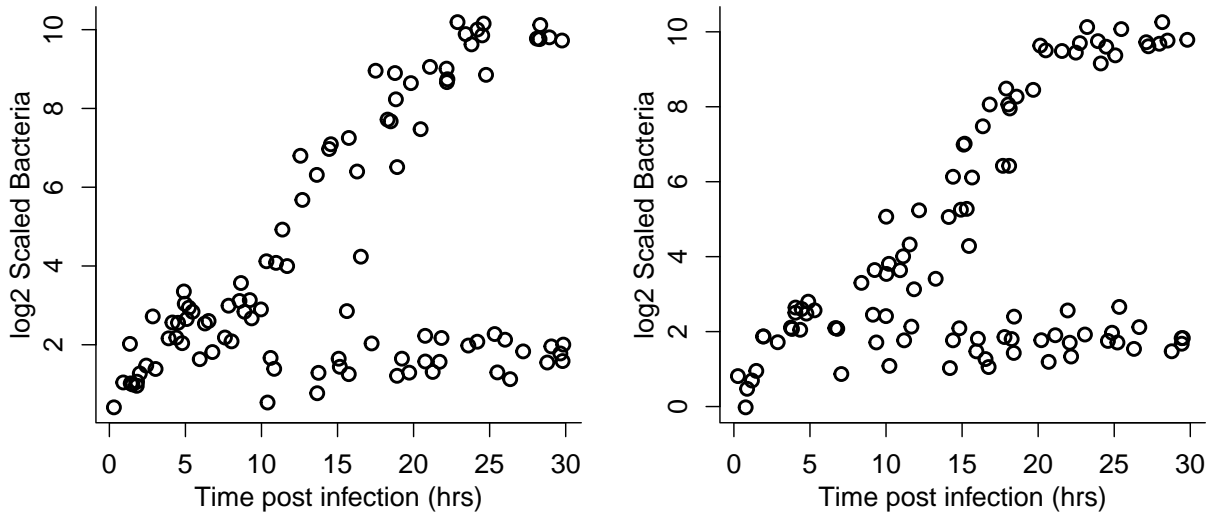

Figure 4: As in Figure 3, for the extended model eqn. (5) with normal and protected bacteria. Parameter values  $r = 0.5$ ;  $Q_A = 12$ ;  $\delta_A = 0.02$ ;  $c = .1$ ;  $K = 1000$ ;  $m = .25$ ;  $\delta_R = 2$ ;  $g = 0.5$ ;  $\eta = 0.25$ ;  $\nu = 0.5$ ;  $L = 5$ ;  $\delta_P = 0.02$ . Conversion rate from  $N$  to  $P$  was given by the logit function  $p(A) = \alpha \Phi(A|\mu = A_p, \sigma = \sigma_p)$ , where  $\Phi$  is the cumulative distribution function of a Gaussian distribution with mean  $\mu$  and standard deviation  $\sigma$ , with  $\alpha = 0.1$ ,  $A_p = 5$ ;  $\sigma_p = 0.5$ . Figure made by script `Split_Outcomes_NPAR.R`.

274 there are enough  $N$ -state bacteria, sustained by division of  $P$ -state cells, to keep AMP production  
 275 at roughly 30% of its maximum rate. However, sustained AMP production could also result, in  
 276 theory, if protected bacteria do not divide but nonetheless produce metabolic products that induce  
 277 a host immune response (having little or no effect on them).

278 Any observed chronic infection load (those in our *Drosophila* experiments are roughly  $10^4$  –  
 279  $10^5$  per host) can be matched in model (5) through a “protected tissue” scenario where protected  
 280 bacteria remain near their carrying capacity  $L$ . But even in this simple model there are multiple  
 281 ways to achieve any desired equilibrium for  $P$  as the balance between cell divisions and killing by  
 282 AMPs.

283 The outcomes in figs. 4 and 5 are not the only possibility. In particular, the split into lethal  
 284 or chronic infections can be transient (Electronic Supplementary Material Fig. S-1). With a larger  
 285 carrying capacity  $L$  for the protected pathogens, and sufficiently high conversion rate, a large  
 286 protected population can become established while the normal, unprotected cells are being driven  
 287 down by the host immune response. The normal daughters of protected parents can then give the  
 288 normal population enough of a “boost” that they rebound from near-elimination, and increase to  
 289 a lethal infection.

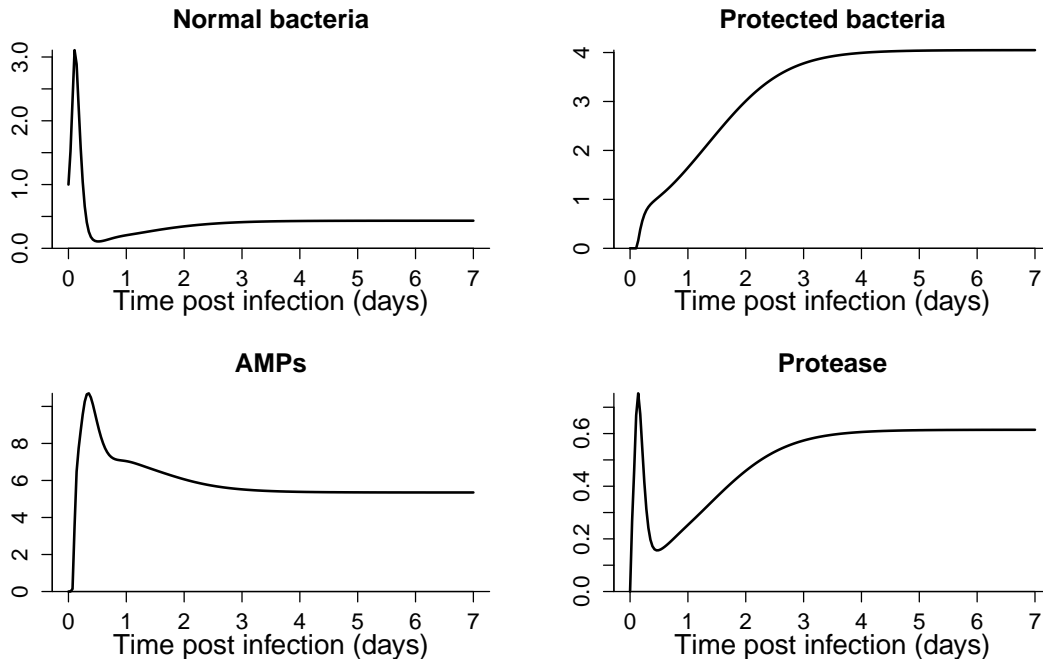

Figure 5: Infection dynamics in the extended model, for a host with fast immune induction so that the outcome is a chronic infection. Parameter values are the same as in fig. 4. Figure made by script `Split_Outcomes_NPAR.R`.

## 4 Discussion

The models presented here provide a proof of concept for our general negative feedbacks hypothesis. Hosts mounting a bacteriocidal immune response, and pathogens responding through mechanisms that degrade the bacteriocides or impede their production, is a simple but very general recipe for dynamics where small differences in initial conditions, or small differences between individuals in the values of key parameters, lead to dramatically different outcomes in different individuals. The effects of these differences occur within the first few hours of infection but the ultimate outcome may not be apparent until several days later. When we additionally allow bacteria to enter a protected state at the cost of reduced ability to proliferate, the model can generate outcomes very much like those observed experimentally. The protected state could be a literal safe haven (e.g., a host tissue where they are shielded from immune responses), or a physiological or metabolic state with reduced sensitivity to the immune response.

Our model for protected pathogens assumed strictly one-way conversion (normal  $\rightarrow$  protected) because that is sufficient to explain chronic infections. Allowing back-conversion would increase the theoretical potential for a suppressed bacteria population to rebound after an initially strong immune response has abated, provoking a second round of immune response. In theory this might lead to cyclical rise and fall of infection, or to a series of infection-suppression-rebound events that grow in magnitude and eventually overwhelm



308 the host. However, we are not aware of any empirical evidence for these scenarios in bacterial  
309 infections.

310 Being able to fit previously collected data is not a strong test of a model, especially when  
311 information that would constrain model assumptions and parameter values is limited. However,  
312 that exercise has produced some new predictions that can be tested experimentally:

- 313 1. Chronic infections are dominated by a sub-population of protected pathogens.
- 314 2. Protected pathogens are not merely inert and invulnerable – they are doing something that  
315 provokes a sustained host immune response. In our models that “something” is that some  
316 daughter cells have the normal, unprotected phenotype, but other mechanisms (such as host  
317 sensing of metabolic by-products) could have the same effect.

318 Stronger tests of our hypothesis should involve predicting in advance the outcome of new experi-  
319 ments, using mutant hosts and pathogens with modified kinetic parameters. The models here are  
320 built from causal links (e.g., pathogens evoke a host immune response whose strength depends on  
321 pathogen abundance) without specifying the underlying “machinery” (e.g., signaling pathways).  
322 This is valuable because it means that model predictions are not dependent on those details. How-  
323 ever, it does not allow us to test our hypothesis more rigorously by predicting in advance what  
324 happens if we monkey with the machinery. To do that, our phenomenological model of the initial  
325 activation of host immune responses (a linear ramp from onset to completion) needs to be re-  
326 placed by a detailed “systems biology” model for the kinetic pathways leading to immune system  
327 activation, primarily the Imd signaling pathway. The actual nature of protected pathogens needs  
328 to be identified, and state transitions modeled mechanistically. than specifying the outcomes at  
329 the level of population parameters (birth, death, and state transition rates). Such models will also  
330 help us identify exactly what processes generate the variation among genetically homogeneous  
331 hosts, raised in a common environment, that can be amplified into divergent infection outcomes.

### 332 **Data accessibility**

333 No original data are presented in this paper. The previously published data used here (in Figure  
334 1), and computer code to replicate all results in the paper, have been uploaded as separate ESM  
335 files during submission of the manuscript to make them available to editors and reviewers. Upon  
336 publication of the paper, those files will be deposited at figshare or a comparable open archive  
337 site.

### 338 **Authors’ contribution**

339 All authors contributed to conceiving the study, formulating hypotheses and models, and writing  
340 the paper. SPE wrote computer scripts, performed the mathematical analyses, and authored the  
341 first draft. All authors gave final approval to submit the paper for publication and agree to be held  
342 accountable for the work performed therein.



### 343 **Competing interests**

344 The authors have no competing interests to declare.

### 345 **Funding**

346 This research was not specifically supported by any research grant. The authors receive research  
347 funding from the US National Science Foundation and National Institutes of Health.

### 348 **Footnotes**

349 Electronic supplementary material is available online at (URL to be inserted at time of publication).

## 350 **References**

- 351 [1] Bian, G., Joshi, D., Dong, Y., Lu, P., Zhou, G., Pan, X., Xu, Y., Dimopoulos, G., and Xi, Z. (2013).  
352 *Wolbachia* invades *Anopheles stephensi* populations and induces refractoriness to *Plasmodium* in-  
353 fection. *Science*, 340(6133):748 – 751.
- 354 [2] Brauner, A., Fridman, O., Gefen, O., and Balaban, N. (2016). Distinguishing between resis-  
355 tance, tolerance and persistence to antibiotic treatment. *Nature Reviews Microbiology*, 14:320–330.
- 356 [3] Buchon N, Silverman N, C. S. (2014). Immunity in *Drosophila melanogaster* - from microbial  
357 recognition to whole-organism physiology. *Nature Reviews Immunology*, 14:796 – 810.
- 358 [4] Chambers, M. C., Jacobson, E., Khalil, S., and Lazzaro, B. P. (2014). Thorax injury lowers  
359 resistance to infection in *Drosophila melanogaster*. *Infection and Immunity*, 82(10):4380 – 389.
- 360 [5] Chambers, M. C., Jacobson, E., Khalil, S., and Lazzaro, B. P. (2019). Consequences of chronic  
361 bacterial infection in *Drosophila melanogaster*. *PLOS ONE*, 14(10):1–22.
- 362 [6] Clemmons, A. W., Lindsay, S. A., and Wasserman, S. A. (2015). An effector peptide family  
363 required for *Drosophila* toll-mediated immunity. *PLOS Pathogens*, 11(4):1–17.
- 364 [7] Duneau, D., Ferdy, J.-B., Revah, J., Kondolf, H., Ortiz, G. A., Lazzaro, B. P., and Buchon, N.  
365 (2017). Stochastic variation in the initial phase of bacterial infection predicts the probability of  
366 survival in *D. melanogaster*. *eLife*, 6.
- 367 [8] Ferreira, A., Naylor, H., Esteves, S., Pais, I., Martins, N., and Teixeira, L. (2014). The toll-  
368 dorsal pathway is required for resistance to viral oral infection in *Drosophila*. *PLOS Pathogens*,  
369 10(12):1–18.
- 370 [9] Hite, J. L. and Cressler, C. E. (2019). Parasite-mediated anorexia and nutrition modulate viru-  
371 lence evolution. *Integrative and Comparative Biology*, 59(5):1264–1274.

- 372 [10] Hite, J. L., Pfenning, A. C., and Cressler, C. E. (2020). Starving the enemy? Feeding behavior  
373 shapes host-parasite interactions. *Trends in Ecology & Evolution*, 35(1):68–80.
- 374 [11] Jent, D., Perry, A., Critchlow, J., and Tate, A. T. (2019). Natural variation in the contribution  
375 of microbial density to inducible immune dynamics. *Molecular Ecology*, 28:5360 – 5372.
- 376 [12] Joo, H.-S., Fu, C.-I., and Otto, M. (2016). Bacterial strategies of resistance to antimicrobial  
377 peptides. *Philosophical Transactions of the Royal Society B: Biological Sciences*, 371(1695):20150292.
- 378 [13] Kleino, A. and Silverman, N. (2014). The *Drosophila* IMD pathway in the activation of the  
379 humoral immuneresponse. *Developmental and Comparative Immunology*, pages 25 – 35.
- 380 [14] Kutzer, M. and Armitage, S. (2016). The effect of diet and time after bacterial infection on  
381 fecundity, resistance and tolerance in *Drosophila melanogaster*. *Ecology and Evolution*, 6:4229–  
382 4242.
- 383 [15] Mitchell, G., Chen, C., and Portnoy, D. A. (2016). Strategies used by bacteria to grow in  
384 macrophages. *Microbiology Spectrum*, 4(3).
- 385 [16] Navarro L, Alto NM, D. J. (2005). Functions of the yersinia effector proteins in inhibiting host  
386 immune responses. *Current Opinion in Microbiology*, 8:21–27.
- 387 [17] Noto, P. B., Abbadessa, G., Cassone, M., Mateo, G. D., Agelan, A., Wade, J. D., Szabo, D.,  
388 Kocsis, B., Nagy, K., Rozgonyi, F., and Otvos Jr, L. (2008). Alternative stabilities of a proline-  
389 rich antibacterial peptide in vitro and in vivo. *Protein Science*, 17(7):1249–1255.
- 390 [18] Schmidt, R., Knappe, D., Wende, E., Ostorházi, E., and Hoffmann, R. (2017). In vivo efficacy  
391 and pharmacokinetics of optimized apidaecin analogs. *Frontiers in Chemistry*, 5:15.
- 392 [19] Takehana, A., Yano, T., Mita, S., Kotani, A., Oshima, Y., and Kurata, S. (2004). Peptidoglycan  
393 recognition protein (PGRP)-LE and PGRP-LC act synergistically in *Drosophila* immunity. *EMBO*  
394 *Journal*, 23:4690 – 4700.
- 395 [20] Tate, A. T., Andolfatto, P., Demuth, J. P., and Graham, A. L. (2017). The within-host dynamics  
396 of infection in trans-generationally primed flour beetles. *Molecular Ecology*, 26(14):3794–3807.
- 397 [21] van Leeuwen, A., Budischak, S. A., Graham, A. L., and Cressler, C. E. (2019). Parasite resource  
398 manipulation drives bimodal variation in infection duration. *Proceedings of the Royal Society B-*  
399 *Biological Sciences*, 286(1902).
- 400 [22] Westblade, L. F., Errington, J., and Doerr, T. (2020). Antibiotic tolerance. *PLOS Pathogens*,  
401 16(10):1–7.

## Electronic Supplementary Material

402 S. P. Ellner et al., "Host-pathogen Immune Feedbacks Can Explain Widely Divergent Out-  
403 comes from Similar Infections".

### Supplementary Figure

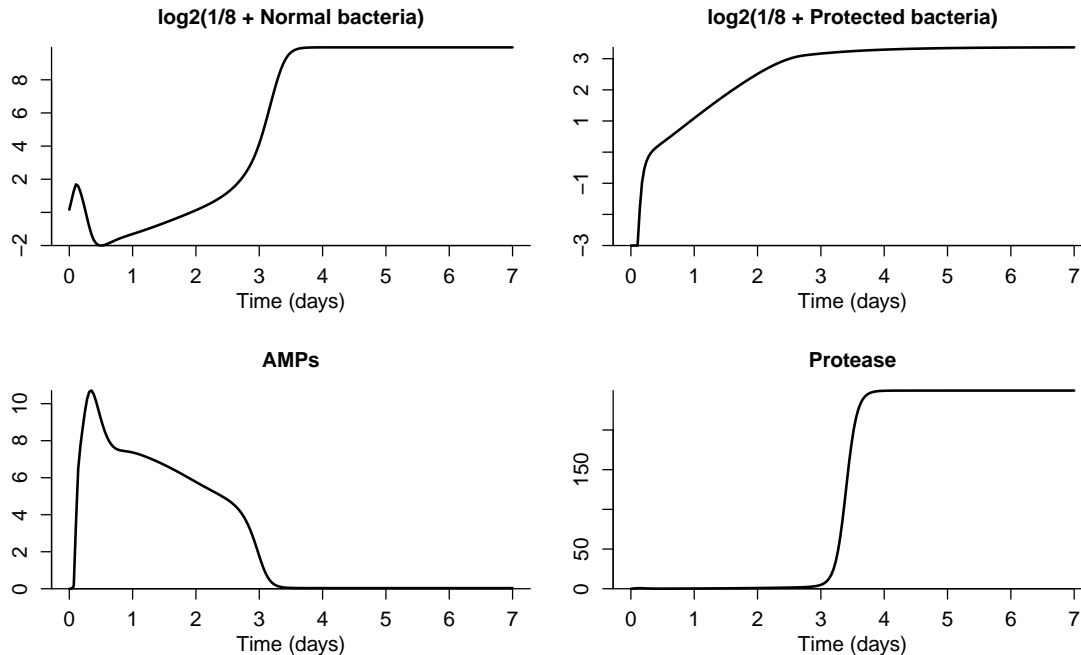

Figure S-1: As in fig. 5 except protected bacteria have carrying capacity  $L = 15$ . Figure made by script `Split_Outcomes_NPAR.R`.

#### 404 **ESM S.1 Analysis of the basic conceptual model, Eqn. (2)**

405 The analysis uses only standard tools of phase-plane and equilibrium stability analysis. We begin  
406 with local stability analysis of equilibria, and then demonstrate that periodic and homoclinic orbits  
407 cannot occur. We use the notation  $\dot{x} = dx/dt$ .

408 There is always an equilibrium at  $B = A = 0$ . This is the pathogen-free equilibrium, where  
409 there are no bacteria, no possibility of bacterial population growth, and no immune response to  
410 bacterial infection. Elsewhere on the axes we have  $\dot{A} < 0$  when  $B = 0$  and  $\dot{A} > 0$  when  $A = 0$ , so  
411 there are no other equilibria on the axes.

412 Interior equilibria occur at interior intersections of the  $B$  nullcline  $A = c^{-1}(1 - B/K)$  with the  $A$   
413 nullcline (3). The  $A$  nullcline begins at  $A = 0$  when  $B = 0$ . Its derivative is positive at  $B = 0$  and

414 is easily seen to have a single sign change from positive to negative, being zero at only one point.  
415 With increasing  $B$  the nullcline therefore increases to a unique maximum and then decreases, but  
416 it remains positive for all  $B > 0$ . These properties imply that (as depicted in fig. 2) there is at  
417 least one interior equilibrium, and there can be up to three. Because the condition for nullcline  
418 intersection is a cubic polynomial, there cannot be more than three.

419 For stability analysis it is convenient to consider general  $f(B)$  (subject to  $f(0) = 0$ ), and (until  
420 further notice) to scale  $B$  such that  $K = 1$ . This means that we are scaling  $B$  relative to the maxi-  
421 mum population that could be produced by unchecked proliferation within the host; in the main  
422 text  $B$  is scaled relative to the density that evokes the host immune response at half its maximum  
423 possible rate. Many of the calculations are done using MAXIMA in the script file `BAMode1.max`.

424 The Jacobian at  $(0,0)$  has  $+1$  as one eigenvalue and the other is negative, implying that the  
425 pathogen-free equilibrium is always a saddle. Any interior equilibrium lies on the interior  $B$  null-  
426 cline, where the Jacobian of the model is found to be of the form

$$427 \quad \mathbf{J} = \begin{bmatrix} -B & -cB \\ f'(B) + (B-1)\frac{c-m}{c} & -(d_A + (c+m)B) \end{bmatrix}. \quad (\text{S1})$$

428 The trace is negative, so stability depends on the determinant,

$$429 \quad \det(\mathbf{J}) = B(\delta_A + f'(B)c + (2B-1)(c+m)) \quad (\text{S2})$$

430 with local stability when  $\det(\mathbf{J}) < 0$ .

431 We now show that local stability is determined by the direction of the nullcline crossing at the  
432 equilibrium, with stability when the  $A$  nullcline crosses from below to above the  $B$  nullcline as  
433  $B$  increases. This model is simple enough to do the stability calculations explicitly, but we will  
434 instead use a general analysis which also covers the extended model in section ESM S.2.

435 The Jacobian at any internal equilibrium has negative trace (this is shown in scripts `BAmodel.max`  
436 and `BAImodel.max` for the present model and the extended model, respectively), so stability de-  
437 pends on the sign of the determinant (stable if positive, a saddle if negative). We can write the  
438 model abstractly as

$$439 \quad \begin{aligned} \frac{dB}{dt} &= F(B, A) \\ \frac{dA}{dt} &= G(B, A) \end{aligned} \quad (\text{S3})$$

440 The interior nullclines can be expressed as the graphs of some functions of  $B$ ,  $A = \bar{A}(B)$  and  
441  $A = \bar{B}(B)$ , respectively, for the  $A$  and  $B$  nullclines. On the nullclines, we have  $F = G \equiv 0$  and

442 hence (using subscripts to denote partial derivatives)

$$\begin{aligned} 443 \quad & F_B + F_A \bar{B}_B = 0 \\ & G_B + G_A \bar{A}_B = 0. \end{aligned} \tag{S4}$$

444 Both of these equalities hold at any interior equilibrium. Solving (S4) for  $\bar{B}_B$  and  $\bar{A}_B$ , we have that  
445  $\bar{A}_B > \bar{B}_B$  at the equilibrium (i.e., the  $A$  nullcline crosses the  $B$  nullcline from below to above as  $B$   
446 increases) is equivalent to

$$447 \quad -\frac{G_B}{G_A} > -\frac{F_B}{F_A}. \tag{S5}$$

448  $F_A$  and  $G_A$  are both negative in the interior. Multiplying through (S5) by the negative number  
449  $-F_A G_A$  we have  $F_A G_B < F_B G_A$ , hence  $F_B G_A - F_A G_B > 0$ . That expression is the determinant  
450 of the model's Jacobian. Hence an "upcrossing" equilibrium is stable, and a "downcrossing"  
451 equilibrium is unstable, as illustrated in in fig. 2B. The connection between between nullcline  
452 crossing and the Jacobian determinant must be well known; if any reader can give us a citation for  
453 it, we would be grateful.

454 An upcrossing can be either a spiral or a node, depending on the sign of the discriminant  $\mathcal{D} =$   
455  $T^2 - 4D$  ( $T, D$  = trace and determinant of the Jacobian). Returning to our conceptual model (2),  
456  $\mathcal{D}$  includes a term  $-4Bc f'(B)$  which is  $\leq 0$  because  $f$  is by assumption non-decreasing, and no  
457 other term involving  $f'$  or  $f$ . Consequently  $\mathcal{D} < 0$  when  $f'(B)$  is sufficiently large, implying  
458 complex conjugate eigenvalues, hence the equilibrium is a spiral. On the other hand, suppose  
459 the upcrossing occurs when the slope of the  $A$  nullcline is 0 or smaller. Using (S4), at a tangent  
460 intersection of the two nullclines, the determinant of the Jacobian is exactly zero. Therefore, at an  
461 upcrossing where the slope of the  $A$  nullcline is just slightly above the (negative) slope of the  $B$   
462 nullcline, the determinant will be nearly zero. The trace at an equilibrium equals  $-B(1 + m + c) -$   
463  $\delta_A$  which is strictly negative (see script `BAmode1.max`), hence the discriminant  $\mathcal{D}$  is positive and the  
464 equilibrium is a node. This confirms that the transition from three equilibria to one always occurs  
465 through a saddle-node collision, as we would expect.

466 Before returning to our specific model, we note that these general arguments about equilibrium  
467 stability and type also apply to the extended model in the following section.

468 The three-equilibrium case is the one of most interest. Analytic conditions for the three-  
469 equilibrium case to occur in our conceptual model involve a cubic polynomial in  $B$  and so are  
470 hard to interpret. However, we can derive an approximate condition for the biologically relevant  
471 case that  $\delta_A \ll 1$ , meaning that little degradation of AMPs occurs on the time scale of interest  
472 (hours to days after an infection occurs). For this calculation we return to the scaling used in  
473 the main text, which sets  $S_A = 1$  rather than  $K = 1$ . Then except when  $B$  is very small (so that

474  $(c + m)B$  is comparable in magnitude to  $\delta_A$ ) the  $A$  nullcline (eqn. (3)) is approximately given by

$$475 \quad A = \frac{Q_A}{(c + m)(1 + B)}. \quad (S6)$$

476 What this approximation misses is that the  $A$  nullcline actually takes a “nosedive” down to  $B =$   
 477  $A = 0$  as  $B \downarrow 0$ , and if that “nosedive” starts above the  $B$  nullcline it gives rise to an additional  
 478 equilibrium with  $B$  very close to zero.

479 With a bit of algebra, intersections of the  $B$  nullcline with the approximate  $A$  nullcline occur where

$$480 \quad (1 + B)(1 - B/K) = \frac{Q_{Ac}}{c + m}. \quad (S7)$$

481 The three-equilibrium case occurs when this quadratic equation has two positive roots sufficiently  
 482 far from  $B = 0$  that eqn. (S6) is accurate, and the “nosedive” equilibrium is then the third equi-  
 483 librium. The left-hand side of (S7) is a downward-curving parabola with roots at  $-1$  and  $K$ . There  
 484 will be two solutions of (S7) with  $B > 0$  when the (i)  $K > 1$  so that the peak of the parabola occurs  
 485 when  $B > 0$ , (ii) the parabola is below the right-hand side at  $B = 0$ , and (iii) the parabola is above  
 486 the right-hand side at its peak. These conditions are satisfied iff

$$487 \quad 1 < \frac{Q_{Ac}}{c + m} < \frac{(K + 1)^2}{4K} \quad (S8)$$

488 The outer inequality implies  $K > 1$ , the inner two imply the other conditions. Although (S8)  
 489 is approximate, we have found that it provides a reliable recipe for finding parameter values at  
 490 which there are three interior equilibria: pick  $c, m$  so  $c + m$  is well above  $\delta_A$ , choose  $Q_A$  well above  
 491  $(m + c)/c$ , and  $K$  such that  $\frac{Q_{Ac}}{c + m} \ll \frac{(K + 1)^2}{4K}$ .

492 We now consider global properties of solution trajectories.

493 First, we find a trapping region in the first quadrant. The axes cannot be crossed from the interior  
 494 of the first quadrant because  $\{B = 0\}$  is invariant, and  $\dot{A} \geq 0$  when  $A = 0$ . Clearly  $\dot{B} < 0$   
 495 whenever  $B > K$ . When  $B = 0$ ,  $\dot{A} = -\delta_A A < 0$  for all  $A > 0$ , and for  $B \neq 0$  we have  $\dot{A} <$   
 496  $Q_A B - (c + m)AB$  so  $\dot{A} < 0$  for  $A \geq Q_A/(c + m)$ . Therefore the rectangle  $\{0 \leq B \leq K, 0 \leq$   
 497  $A \leq Q_A/(c + m)\}$  is invariant. Moreover, the derivative bounds imply that eventually  $B \leq K$   
 498 and  $A \leq Q_A/(c + m)$ , so that rectangle is eventually entered by any trajectory starting outside it.  
 499 The portion of the  $B$  nullcline interior to the first quadrant is a line running from one axis to the  
 500 other, and any interior equilibrium must lie on this line. By enlarging the rectangle (if necessary)  
 501 to contain the interior portion of the  $B$  nullcline, we have an attracting and trapping region that  
 502 contains all equilibria in the first quadrant.

503 Second, periodic solutions can be ruled out using the Bendixson-Dulac negative criterion for pla-  
504 nar systems. Let  $\dot{x}$  denote  $dx/dt$  for any variable  $x$ . The criterion says that if there is a smooth  
505 function  $g(B, A)$  such that

$$506 \quad \frac{\partial(g\dot{B})}{\partial B} + \frac{\partial(g\dot{A})}{\partial A} \tag{S9}$$

has constant non-zero sign almost everywhere in a simply connected region  $\mathcal{R}$  in the plane, then there is no closed orbit contained in  $\mathcal{R}$ . For (2) we consider the region  $\mathcal{R} = \{B > 0\}$  and take  $g(A, B) = 1/B$ . With some help from MAXIMA (script BAmode1.max) we find that (S9) equals

$$-(BKm + K\delta_A + BKc + B)/(BK) < 0$$

507 so there are no closed orbits contained entirely in the region  $B > 0$ . Can there nonetheless be a  
508 closed orbit contained in  $\{B \geq 0\}$ ? Any such orbit that is not contained in  $\{B > 0\}$  must include a  
509 point where  $B = 0$ . But the region  $B = 0$  is invariant, hence that orbit must lie entirely in  $\{B = 0\}$ ,  
510 which is impossible. Thus, there cannot be any closed orbits in the region  $B \geq 0$  other than the  
511 trivial equilibrium  $B = A = 0$ . Note that the functional form of  $f(B)$  is irrelevant for this result,  
512 because  $f(B)/B$  is independent of  $A$  and so it contributes nothing to (S9).

513 Additionally, there cannot be a homoclinic orbit running from  $(0, 0)$  to itself. Any such orbit would  
514 constitute the stable and unstable manifolds of  $(0, 0)$ . However, the stable manifold of  $(0, 0)$  is the  
515 axis  $\{B = 0\}$  on which the dynamics are  $\dot{A} = -\delta_A A$ , and trajectories on the axis do not approach  
516  $(0, 0)$  as  $t \rightarrow -\infty$ .

517 Finally, we show that when there is only one interior equilibrium, it is globally stable in the interior  
518 of the first quadrant. Any solution trajectory eventually enters and stays in the trapping region,  
519 so (by the Poincaré-Bendixson Theorem) its  $\omega$ -limit set must be an equilibrium, a periodic orbit,  
520 or a finite set of equilibria connected by homoclinic and/or heteroclinic orbits. With only one  
521 interior equilibrium, no periodic orbits, and the origin a saddle that can only be approached along  
522 an axis, the  $\omega$ -limit set must be either that one equilibrium, or that equilibrium and a homoclinic  
523 orbit originating and ending at the equilibrium. However, we have shown above that when there  
524 is only one interior equilibrium, it is locally stable, so there cannot be any such homoclinic orbit.  
525 Thus, every trajectory originating in the interior of the first quadrant comes arbitrarily close to the  
526 unique interior equilibrium, and therefore must converge to it.

## 527 **ESM S.2 Analysis of an extended model**

528 As noted in the main text, our model assumes that there is no constitutive defense (AMP pro-  
529 duction rate is zero when  $B = 0$ ) and the pathogens remove existing AMPs by degradation and  
530 sequestration, rather than interfering with their production. To show that our conclusions are not



531 special to that situation, for the moment suppose that there can be a low-level constitutive defense,  
 532 and that effectors  $R$  interfere with AMP production, either as an alternative to degradation or in  
 533 addition to degradation. Specifically, assume that AMP production rate is positive at  $B = 0$ , and is  
 534 decreased by a factor  $e^{-\mu B}$  in the slow-fast reduction of the scaled model where  $R$  is proportional  
 535 to  $B$ . To allow outcomes where the host defense is successful, we assume  $\mu = O(1)$  at most. This  
 536 means that immune suppression does not already stifle AMP production before the pathogen den-  
 537 sity is high enough to induce an immune response with nontrivial effects on the pathogen. The  
 538 equation for  $A$  in the scaled model is then

$$539 \quad \frac{dA}{dt} = (a + f(B))e^{-\mu B} - \delta_A A - qAB \quad (S10)$$

540 where  $f(B) = Q_A B / (1 + B)$ , as in the original model, and  $q \geq 0$  represents the combined effects  
 541 of degradation and sequestration (which in general could be absent). The  $A$  nullcline is given by  
 542 the curve

$$543 \quad A = \frac{a(1 + B) + Q_A B}{(1 + B)(\delta_A + qB)e^{\mu B}}. \quad (S11)$$

544  $\alpha = a/\delta_A$  is the constitutive level of defense, i.e. the steady-state value of  $A$  in the absence of  
 545 pathogens. The equilibrium  $B = A = 0$  in our original model thus becomes  $B = 0, A = \alpha$   
 546 when constitutive defense is possible. The biologically relevant situation is that  $\alpha$  is small relative  
 547 to the values that can occur when pathogen is present. The slope of the nullcline at  $B = 0$  is  
 548  $\delta_A^{-2}(Q_A \delta_A - a\mu \delta_A - aq)$  which can be positive or negative at zero.

549 Elementary calculus shows that the slope of the  $A$  nullcline is a positive factor times a term that  
 550 has the sign of the slope at 0, and decreases monotonically in  $B$ , eventually becoming negative.  
 551 Thus, when the slope at 0 is positive, the the nullcline has the same qualitative shape as in our  
 552 original model, increasing at  $B = 0$  up to a peak, and then decreasing. When the slope at zero is  
 553 negative, it remains negative for all  $B$ .

554 The Jacobian at the pathogen-free equilibrium ( $B = 0, A = \alpha$ ) has eigenvalues  $-\delta_A, 1 - \alpha c$  so for  
 555  $\alpha$  small it will be a saddle, as in our original model. Specifically, it will be a saddle whenever the  
 556 pathogen-free equilibrium lies below the  $B$  nullcline. Thus, the three qualitative options shown  
 557 in fig. 2A also hold for the modified model. The Bendixson-Dulac criterion rules out periodic  
 558 orbits in the region  $B > 0$ , and periodic or homoclinic orbits that include a point where  $B = 0$   
 559 are also ruled out, by arguments identical to those for the original model. The general argument  
 560 in sec. ESM S.1 shows that equilibrium stability depends on the direction of nullcline crossings,  
 561 exactly as in the original model, and that the type (spiral or node) depends on the steepness of the  
 562 crossing.

563 With constitutive defense possible ( $a > 0$ ), all the possible nullcline configurations in the original  
 564 model (fig. 2A) remain possible, but it is also possible for the pathogen-free equilibrium to lie

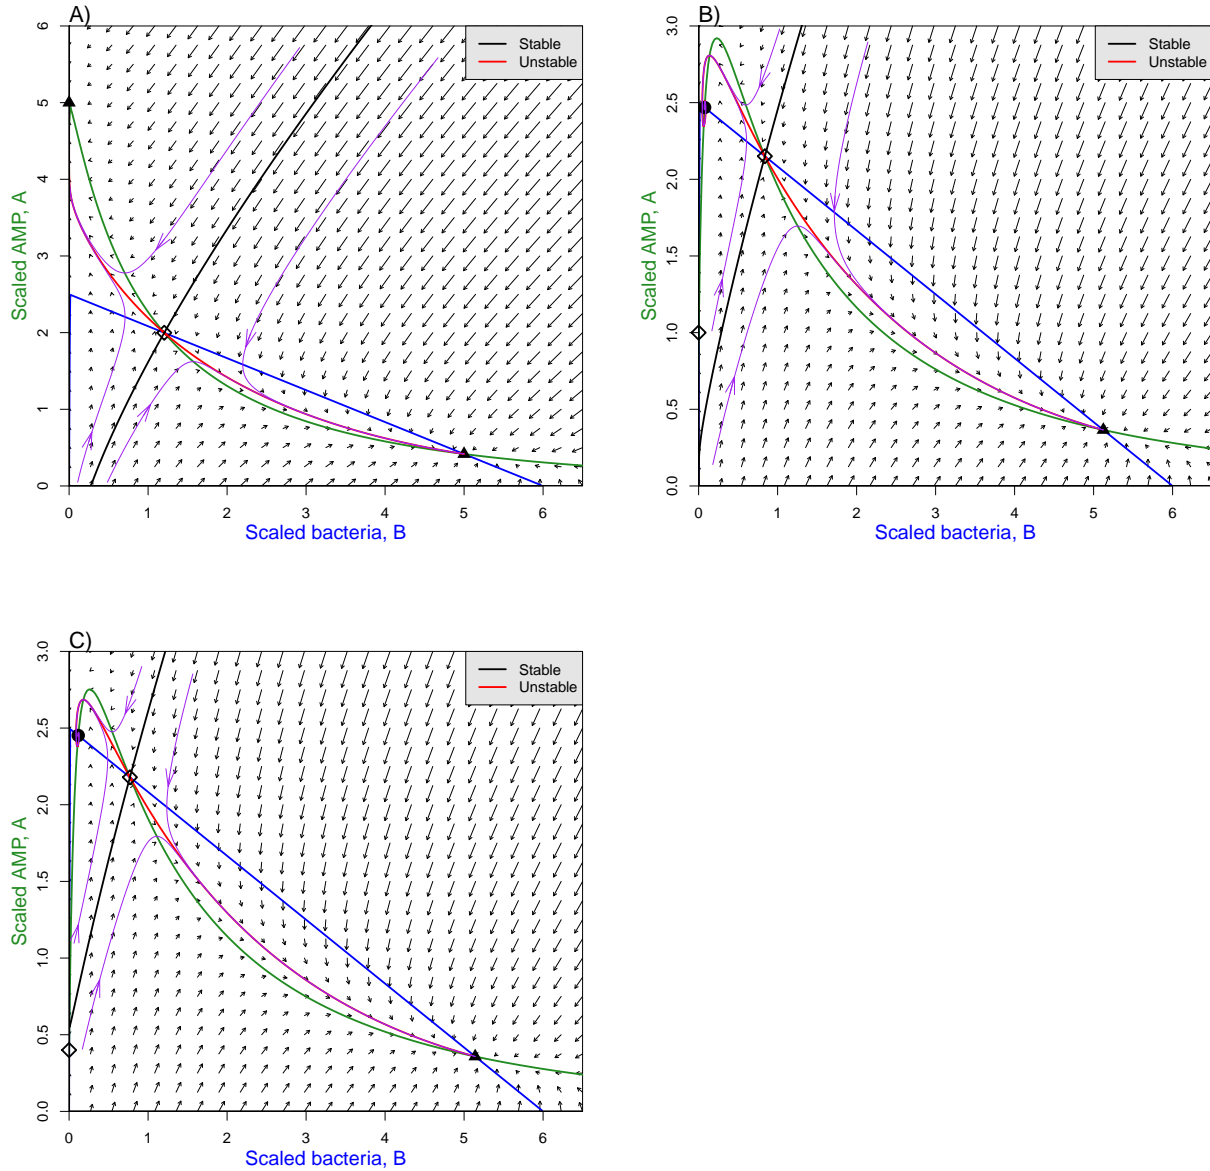

Figure S-2: Phase-plane diagrams of the extended conceptual model. **A)** The nullcline configuration producing bistability in the extended model when the constitutive defense equilibrium  $B = 0, A = a/\delta_A$  lies above the  $B$  nullcline. **B),C)** Nullcline and stable manifold configurations that can occur when there is a low-level constitutive defense. Parameter values  $Q_A Q = 2.4, \delta_A = 0.05, c = .4, K = 6, q = .5, mu = 0.15$  in all panels, and  $a = 0.25, 0.05, 0.02$  in panels A), B), C) respectively. Figures created by script file `BAIModel.R`.

565 above the  $B$  nullcline, as illustrated in fig. S-2A. In that situation, the Jacobian eigenvalues imply  
566 that the pathogen-free equilibrium is a stable node. This creates the potential for the bistability  
567 scenario shown in which the low- $B$  stable equilibrium has  $B = 0$  exactly. If the interior  $A$  nullcline  
568 is entirely above the interior  $B$  nullcline (not shown), the pathogen-free equilibrium is the only  
569 equilibrium and therefore globally stable, for the same reasons as in the original model. However,  
570 these cases only occur when the constitutive defense is so strong that a small introduced pathogen  
571 population is quickly exterminated.

572 In the more realistic situation of low-level constitutive defense, the extended model offers one  
573 more scenario for small between-host variability to produce bimodal outcomes. For parameter  
574 values such that the stable manifold of the interior saddle approaches the  $A$  axis, invasion of the  
575 host by a small bacterial population (i.e., initial conditions  $0 < B \ll 1, A = a$ ) lead to chronic infec-  
576 tion if the pathogen-free equilibrium is above the stable manifold (fig. S-2B), and lethal infection  
577 if the opposite is true (fig. S-2C).

578 It is reasonable to ask if the extended model might offer an explanation for chronic infec-  
579 tions, so that we do not need to posit protected pathogens, but this cannot occur for biologically  
580 reasonable parameter values. That is, it is not possible for the value of  $B$  at the low- $B$  equilibrium  
581 to change much. Increasing  $a$  from zero (as in the original model) to a positive value moves the  
582  $A$  nullcline up, and decreases the  $B$  value at the low- $B$  equilibrium. Increasing  $\mu$  from zero has  
583 the opposite effect, but it is small. The effect can be approximated by using the Implicit Function  
584 Theorem to compute the derivative of a nullcline intersection point with respect to perturbation  
585 of  $\mu$  away from zero (see script `BAImodel.max`). At  $B = 0$  that derivative is zero. The derivative  
586 at small  $B$  is therefore  $O(B)$ , hence the change in  $B$  at the low- $B$  equilibrium is  $O(\mu B)$ . Extremely  
587 strong suppression of the host immune response by a small number of bacteria would therefore  
588 be required for suppression to have a substantial effect on the location of low- $B$  equilibrium.

### 589 **ESM S.3 Modeling the Imd signaling pathway**

590 In this section we present the structure and assumptions of our model for the Imd signalling  
591 pathway leading to AMP production, and the resulting dynamic equations. We then show that  
592 the model can produce a wide range of temporal patterns for the ramp-up of AMP production  
593 rate, to justify the simulations of infection dynamics models in the main text where between-host  
594 variation in the ramp-up temporal pattern leads to bimodal infection outcomes. Mathematical  
595 derivation of the dynamic equations is in Electronic Supplementary Material ESM S.4.

596 Figure S-3 summarizes our model for the Imd signalling pathway. We assume that the fork of  
597 this pathway through PGRP-LE is much less important for immune activation [19], and model  
598 the fork through PGRP-LC. Our model is based on the experimentally determined structure of the

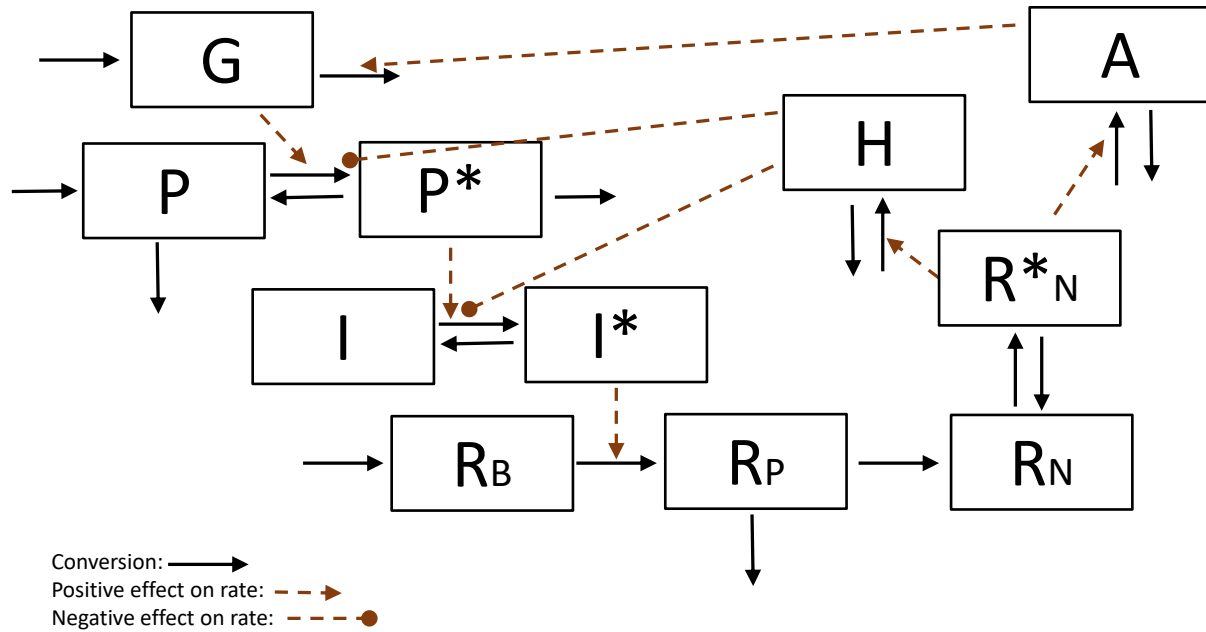

Figure S-3: Our simplified model for the fork of the IMD signaling pathway in *D. melanogaster* cells going through PGRP-LC. Solid black arrows indicate flows. Dashed red lines indicate affects of a variable's concentration on the rate of a reactions, either positive (lines ending in arrowheads) or negative (lines ending in solid circles). The state variables are  $G$ : peptidoglycans exterior to the cell (moles/l);  $P, P^*$ : unbound and bound PGRP-LC (moles);  $I, I^*$ : free and recruited IMD (moles);  $R_B, R_P$ : Relish B and P outside the nucleus;  $R_N, R_N^*$ : unbound and bound Relish in the nucleus;  $H, A$ : feedback effector molecules (of various kinds) that act within the cell ( $H$ ) and exterior to the cell  $A$  (moles). We consider  $A$  to include AMPs that defend against bacteria.

599 IMD pathway [13], but as noted below, at one point we simplify the model by assuming that a  
 600 particular step happens quickly relative to the others. In addition to the initial signaling cascade,  
 601 our model includes the main known feedbacks whereby up-regulated gene products modify the  
 602 reaction rates of steps in the cascade, because those can play an important role in shaping the  
 603 temporal pattern of immune activation (see ESM S.3.1 below).

604 The steps in our model of the pathway are as follows.

- 605 1. Presence of bacteria is indicated by peptidoglycans (PGN)  $G$  (moles/l), external to the cell.  
 606 We will eventually couple the Imd pathway to a population of bacteria, in which creation  
 607 and loss of PGN is explicitly modeled. In this section we treat  $[G]$  as an exogenous variable  
 608 affected by feedback effector molecule  $A$  as described below.
- 609 2. Signaling is initiated by PGN  $G$  binding to PGRP-LC  $P$  to produce bound PGRP-LC,  $P^*$ . We  
 610 assume that this is a higher-order reaction, as PGN are a polymer and PGRP-LC form poly-  
 611 mers on binding to it.

- 612 3. Bound  $P^*$  catalyzes the conversion of free Imd  $I$  to recruited Imd  $I^*$ ; reversion from recruited  
613 to free is assumed to have first-order kinetics.
- 614 4. In our model, recruited Imd catalyzes the conversion of Relish<sub>B</sub> to Relish<sub>P</sub>. This is a deliber-  
615 ate simplification. In reality, recruited Imd catalyzes the conversion caspase to active caspase  
616 (which catalyzes conversion of Relish<sub>B</sub> to Relish<sub>U</sub>) and the conversion of kinase to active  
617 kinase (which catalyzes the conversion of Relish<sub>U</sub> to Relish<sub>P</sub>). Because these steps are not af-  
618 fected by the negative regulators (described below), we can simplify the model without losing  
619 any qualitative features by assuming that active caspase and kinase are “readout” variables  
620 for recruited Imd, and ignoring the intermediate form Relish<sub>U</sub>.
- 621 5. Relish<sub>P</sub> can be transported into the nucleus, where it can be unbound ( $R_N$ ) or bound to pro-  
622 moter sites for the production of AMPs and negative regulators ( $R_N^*$ ). Binding and unbinding  
623 are not especially fast relative to other steps in the cascade, so we cannot assume that bound  
624 vs. unbound Relish<sub>P</sub> are in steady-state with respect to the total amount in the nucleus. By  
625 only tracking the total bound amount, we simplify the reality that nuclear Relish actually  
626 binds to several promoter sites for different processes.
- 627 6. Similarly, although multiple pathways connect nuclear bound Relish to its feedbacks on the  
628 signaling cascade, we aggregate them into two effectors, one acting in the cytoplasm which  
629 we call  $H$ , and the other (called  $A$  for amygdase) which acts outside the nucleus.  $H$  impedes  
630 formation of  $P^*$  and  $I^*$  in the nucleus, and  $A$  degrades free PGN. We assume that both  $A$  and  
631  $H$  are produced even in the absence of bound Relish, but their production rate increases in  
632 proportion to the amount of bound Relish.
- 633 7. Bound nuclear Relish also up-regulates production of bacteriocidal AMPs. Rather than model  
634 this separately, we assume that AMP concentration is proportional to  $A$ .
- 635 8. There is also positive feedback from to production of Relish<sub>B</sub>. If this feedback is directly  
636 proportional to the amount of bound nuclear Relish in the nucleus, the model can produce  
637 an unlimited spiral of Relish increase. We therefore assume a Michaelis-Menten saturating  
638 relationship for this feedback.

639 The rate equations for each of these reaction steps are derived in Electronic Supplementary Mate-  
640 rial ESM S.4. Notation for the model is summarized in Table S-1, and the resulting model equations  
641 are presented in Table S-2.

### 642 ESM S.3.1 Temporal patterns of immune activation

643 We now reach the second aim of this section, which is to explore the range of temporal activation  
644 patterns that the model can produce. AMP production rate is proportional to  $R_N^*$ , so we ask how  
645  $R_N^*$  can increase over time from its initial value of zero up to a steady state, when the pathway is  
646 activated by  $G$  going from zero to a positive value.

Table S-1: Parameters and state variables for the Imd pathway model and their definitions. Active or bound forms of a molecule are indicated by a star, as in  $I^*$ . Coefficient subscripts indicate what they multiply in the model, e.g.  $c_I$  and  $\delta_I$  multiply  $I$ .

| Parameter    | Definition or formula                                             | Units                                           |
|--------------|-------------------------------------------------------------------|-------------------------------------------------|
| $\delta_X$   | First-order degradation rate of molecule $X$                      | $\text{time}^{-1}$                              |
| $\rho_{X^*}$ | First-order inactivation or unbinding rate of $X^*$               | $\text{time}^{-1}$                              |
| $c_X$        | Rate constant for a reaction involving $X$ and possibly others    | concentration(s) $\times$<br>$\text{time}^{-1}$ |
| $Q_X$        | External supply rate, or replenishment rate, of $X$               | moles/time.                                     |
| $\phi_X$     | Coefficient for the strength of a feedback effect of bound Relish | varies; often 1/concentration                   |
| $[X]$        | Concentration of $X$ (any variable)                               | moles/l                                         |
| $G$          | Peptidoglycans exterior to the cell                               | moles/l                                         |
| $P, P^*$     | PGRP-LC — bound and unbound                                       | moles                                           |
| $I, I^*$     | Imd — free and recruited                                          | moles                                           |
| $R_B, R_P$   | Relish — outside the nucleus                                      | moles                                           |
| $R_N, R_N^*$ | Relish – free and bound, in the nucleus                           | moles                                           |
| $A, H$       | Effector molecules up-regulated by bound nuclear Relish           | moles                                           |

Table S-2: Dynamic equations for the simplified Imd signalling pathway model. The equations assume that all catalyzed reactions are in the first-order phase (i.e., all reactants are at low concentrations) so that saturation, as in the Michaelis-Menten rate equation, can be ignored (Ingalls 2013). Units of state variables are either amounts (moles) in a cell of volume  $V$ , or a concentration (moles/l) where  $[X]$  denotes the concentration of  $X$ . Feedback effects triggered by binding of nuclear Relish are indicated by **purple font**.

---


$$\frac{dP}{dt} = Q_P - mc_P e^{-\phi_P[H]} P^k [G] e^{-\phi_G[A]} - \delta_P P \quad (\text{S12a})$$

$$\frac{dP^*}{dt} = c_P e^{-\phi_P[H]} P^k [G] e^{-\phi_G[A]} - \delta_{P^*} P^* \quad (\text{S12b})$$

$$\frac{d[I^*]}{dt} = c_I e^{-\phi_I[H]} ([I_T] - [I^*]) P^* - \rho_{I^*} [I^*] \quad (\text{S12c})$$

$$\frac{d[R_B]}{dt} = Q_R/V + \phi_R \frac{[R_N^*]}{K_R + [R_N^*]} - c_B [I^*] [R_B] - \delta_R [R_B] \quad (\text{S12d})$$

$$\frac{d[R_P]}{dt} = c_B [I^*] [R_B] - D_P [R_P] - \delta_R [R_P] \quad (\text{S12e})$$

$$\frac{d[R_N]}{dt} = D_P [R_P]/V_N - c_N [R_N] + c_{N^*} [R_N^*] - \delta_N [R_N] \quad (\text{S12f})$$

$$\frac{d[R_N^*]}{dt} = c_N [R_N] - c_{N^*} [R_N^*] \quad (\text{S12g})$$

$$\frac{d[H]}{dt} = Q_H/V + c_H [R_N^*] - \delta_H [H] \quad (\text{S12h})$$

$$\frac{d[A]}{dt} = Q_A/V + c_A [R_N^*] - \delta_A [A] \quad (\text{S12i})$$


---



Table S-3: Optimized parameter values corresponding to the four curves in Figure S-4. Columns 1-4 give parameters for the black, red, blue, and purple curves. Other parameters had the same value for all four curves:  $V = 1, V_N = 0.1, G = 10, m = 2, k = 2, \delta_P = .01, \delta_{P^*} = 0.02, \delta_R = .01, \delta_N = 0.01, c_H = 0.05, c_A = 0.1, \delta_H = .05, \delta_A = .05, \rho_{I^*} = 0.01, K_R = 2$ .

| Parameter | 1     | 2    | 3     | 4    |
|-----------|-------|------|-------|------|
| $D_P$     | 0.56  | 9.94 | 0.59  | 8.96 |
| $c_P$     | 0.00  | 1.30 | 0.00  | 0.06 |
| $c_I$     | 3.86  | 4.88 | 10.00 | 2.38 |
| $c_B$     | 0.06  | 0.09 | 0.01  | 0.04 |
| $c_N$     | 0.04  | 5.35 | 0.01  | 0.06 |
| $c_{N^*}$ | 8.77  | 4.26 | 0.01  | 9.97 |
| $\phi_P$  | 0.00  | 0.14 | 0.00  | 0.07 |
| $\phi_G$  | 0.00  | 0.11 | 0.00  | 0.05 |
| $\phi_I$  | 0.12  | 0.41 | 0.33  | 0.32 |
| $\phi_R$  | 10.01 | 0.02 | 0.04  | 6.08 |

647 The absolute rates of processes in the model are controlled by parameters for which we have  
 648 no empirical estimates, so we can only ask about relative changes over time. We therefore first  
 649 rescaled the model so that  $P, [R_B], [H]$  and  $[A]$  have steady-state value 1 in the absence of pathogen  
 650 ( $G = 0$ ) and  $[I_T] = 1$ . This results in the rescaled model having parameter values

$$651 \quad Q_P = \delta_P, I_T = 1, Q_R/V = \delta_R, Q_H/V = \delta_H, Q_A/V = \delta_A. \quad (S13)$$

652 By trial and error, we found a set of plausible “default” parameter values producing a moderately  
 653 fast ramp-up during a time period centered at time  $t = 4$  hours after the pathogen arrives to  
 654 initiate activation. We then used numerical optimization to find kinetic parameters producing  
 655 ramp-up patterns that minimized the sum of squared deviations from four “target” patterns of  
 656 monotone increase from zero to an asymptote (script `Imd_Simplified_RampUp.R`). Values of the  
 657 parameters  $D_P, c_P, c_I, c_B, c_N, c_{N^*}, \phi_P, \phi_G, \phi_I$  and  $\phi_R$  were allowed to vary; others were held constant  
 658 at the default values. The resulting optimal parameter sets included some astronomically large  
 659 kinetic parameters (up to  $10^{18}$ ), so we modified the optimization so that the goodness-of-fit was  
 660 penalized when any parameter exceeded 10 (with time measured in minutes), with the penalty  
 661 proportional to the square of the excess.

662 The optimized parameters with that penalty, listed in Table S-3, produced the four curves in Fig.  
 663 S-4: slow (blue) or fast (red) steady increase starting very soon after the pathogen arrives, or rapid  
 664 increase following a shorter (purple) or longer (black) delay. Model solutions over a longer time  
 665 span confirm that all solution curves asymptote to a constant steady-state value. These four do  
 666 not exhaust the possibilities; they were chosen to illustrate that the model

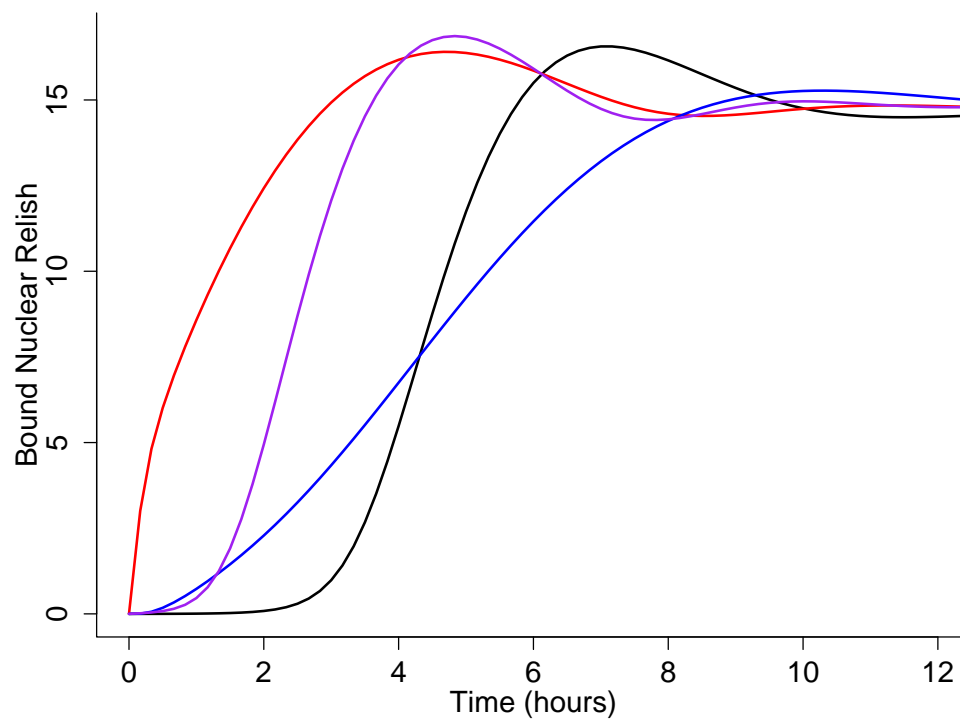

Figure S-4: Four possible patterns of immune response activation in the Imd pathway model, Table S-2, rescaled according to eqn. (S13). Parameter values for the curves are given in Table S-3. Figures created by script file `Imd.Simplified.RampUp.R`.

## 667 **ESM S.4 Derivation of rate equations for Imd pathway model**

668 We consider a signaling cascade initiated by the increase of PGN concentration from 0 to  $[G] > 0$ .  
669 As noted in the main text, we assume that all catalyzed reactions are in the first-order phase that  
670 occurs when all reactants are at low concentrations (Ingalls 2013).

671 Models need to be derived in terms of the amounts of different molecules rather than their concen-  
672 trations, because amounts flow (e.g., into and out of the nucleus, from bound to unbound states),  
673 not concentrations. However, reaction rates per unit volume within in the cell typically depend  
674 on concentrations, so many rate equations include concentrations  $[X] = X/V$  ( $V$  =cell volume),  
675 and then the rate per unit volume is scaled back up by cell volume. If the dynamic equation for a  
676 extra-nuclear molecule  $X$  is first-order with respect to  $[X]$ , then the equation can written entirely  
677 in terms of  $[X]$ . That is,

$$\begin{aligned} \frac{dX}{dt} &= [X] \times (\text{something not involving } X) \times V \\ \implies \frac{d[X]}{dt} &= [X] \times (\text{something not involving } X). \end{aligned} \tag{S14}$$

679 On the other hand, if the reaction is higher-order in  $[X]$  this generally won't be true. We do the  
680 same for molecules in the nucleus, scaling by nuclear volume  $V_N$ .

681 For transmembrane (PGRP-LC) and within-nucleus molecules, we use amounts rather than con-  
682 centrations as the units for state variables.

683 We begin by modeling the initial cascade leading to buildup of Relish in the nucleus. The subse-  
684 quent feedbacks resulting from bound nuclear Relish will then be added.

685 The reaction diagrams below often omit degradation processes. To prevent unrealistic buildups,  
686 every molecule with a nonzero baseline production rate (in the absence of any stimulus by PGN)  
687 is tacitly assumed to have first-order degradation kinetics.

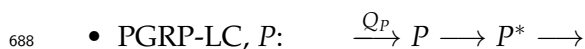

Unbound PGRP-LC is replenished at rate  $Q_P$ , and can form a bound complex with PGN. Because PGN is a polymer and a bound complex includes several PGRP-LC molecules, we assume that this reaction rate is higher-order in  $[P]$  with exponent  $k > 1$ , and formation of one bound complex eliminates  $m > 1$  unbound molecules. A reasonable default assumption is  $m = k$ ; this would hold exactly if complex formation involves simultaneous binding of  $m = k$  PGRP-LC molecules, or as an approximation for multistep cooperative binding (Ingalls 2013, sec. 3.3). We assume that there is no reversion from bound to unbound states, but bound and unbound complexes degrade at rates  $\delta_P$  and  $\delta_{P^*}$ , respectively. Letting  $P^*$  denote the number

of bound complexes, the kinetic equations are then

$$\frac{dP}{dt} = Q_P - mc_P P^k [G] - \delta_P P \quad (\text{S15})$$

$$\frac{dP^*}{dt} = c_P P^k [G] - \delta_{P^*} P^* \quad (\text{S16})$$

689 • Imd:  $I \rightleftharpoons I^*$

690 Recruitment of free Imd molecules is catalyzed by bound PGRP-LC complexes, and reversion  
691 to free Imd has first-order kinetics. Because  $[I] + [I^*]$  remains at some constant level  $[I_T]$ , we  
692 can write an equation for  $I^*$  only:

$$693 \frac{d[I^*]}{dt} = c_I([I_T] - [I^*])P^* - \rho_{I^*}[I^*] \quad (\text{S17})$$

694 • Extranuclear Relish:  $\xrightarrow{Q_R} R_B \longrightarrow R_P \longrightarrow R_N$

As noted in the main text,  $I^*$  catalyzes formation of activated caspase and kinase, which then catalyze conversion of  $R_B$  to  $R_U$  and conversion of  $R_U$  to  $R_P$ . We simplify this step by assuming that the concentrations of activated caspase and kinase are proportional to  $I^*$ , and collapsing the conversion of  $R_B$  to  $R_P$  into a single step.  $R_P$  can be transported into the nucleus ( $R_P$  in the nucleus is denoted  $R_N$ ); we assume that this occurs at a rate proportional to its extra-nuclear concentration. This is active transport, rather than diffusion, and we assume that it is irreversible. For simplicity we give the same intrinsic degradation rate  $\delta_R$  to both forms of Relish.

$$\frac{d[R_B]}{dt} = Q_R/V - c_B[I^*][R_B] - \delta_R[R_B] \quad (\text{S18})$$

$$\frac{d[R_P]}{dt} = c_B[I^*][R_B] - D_P[R_P]/V - \delta_R[R_P] \quad (\text{S19})$$

695 • Relish in the nucleus :  $\xrightarrow{D_P[R_P]V} R_N \rightleftharpoons R_N^* \longrightarrow$

Relish in the nucleus promotes several different processes, so to model in full detail we should consider several different binding sites. However, we simplify this by just classifying Relish in the nucleus as bound or unbound, and have all up-regulated processes respond to the total amount of bound Relish.  $R_N, R_N^*$  denote unbound and bound, respectively,  $R_P$  in the nucleus. Note that Relish diffusing into the nucleus is divided by nuclear volume  $V_N$  in the first rate equation because the Relish inflow rate is  $D_P[R_P]$ .

$$\frac{d[R_N]}{dt} = D_P[R_P]/V_N - c_N[R_N] + c_{N^*}[R_N^*] - \delta_N[R_N] \quad (\text{S20})$$

$$\frac{d[R_N^*]}{dt} = c_N[R_N] - c_{N^*}[R_N^*]. \quad (\text{S21})$$

696 • Effects of bound Relish

While multiple pathways connect nuclear bound Relish to its negative feedbacks on the Imd pathway, for simplicity we aggregate them into two effectors, one acting in the cell cytoplasm which we call  $H$ , and the other (called  $A$  for amygdase) which acts outside the cell. The model tracks their extra-nuclear concentrations:

$$\frac{d[A]}{dt} = Q_A/V + c_A[R_N^*] - \delta_A[A] \quad (\text{S22})$$

$$\frac{d[H]}{dt} = Q_H/V + c_H[R_N^*] - \delta_H[H] \quad (\text{S23})$$

697  $H$  impedes formation of  $P^*$  and  $I^*$  in the nucleus, and  $A$  degrades the external stimulus,  
698 free PGN. We assume that both  $A$  and  $H$  are produced even in the absence of bound Relish,  
699 but their production rate increases in proportion to the amount of bound Relish. Both have  
700 first-order degradation kinetics.

701 There is also a positive feedback from bound Relish, an increased production rate of Relish<sub>B</sub>.  
702 If this feedback is directly proportional to the amount of bound Relish in the nucleus, we can  
703 get an unlimited spiral of Relish increase. We therefore assume a Michaelis-Menten saturating  
704 relationship.

705 The final dynamic equations presented in Table S-2 include these feedback effects of  $H$  and  $A$ .
